# Supplementary material for: Annealing post-drawn polycaprolactone (PCL) nanofibers optimizes crystallinity and molecular alignment and enhances mechanical properties and drug release profiles
Source: Royal Society of Chemistry journal article supplement (doi:10.1039/d1ma01183a), 2022-01-01
Supplement: d1ma01183a1.pdf [file d1ma01183a1.pdf]

## Supplementary Figures and Tables

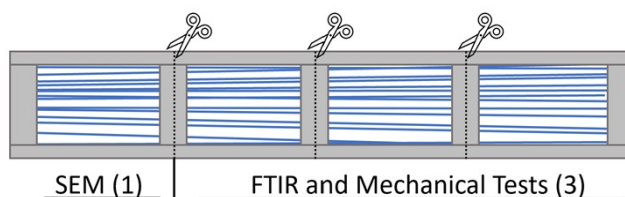

**Supplemental #1: Depiction of a single strip of fibers being segmented into quadruplicates for analysis.** Each strip is subject to a single annealing treatment before being separated for analysis.

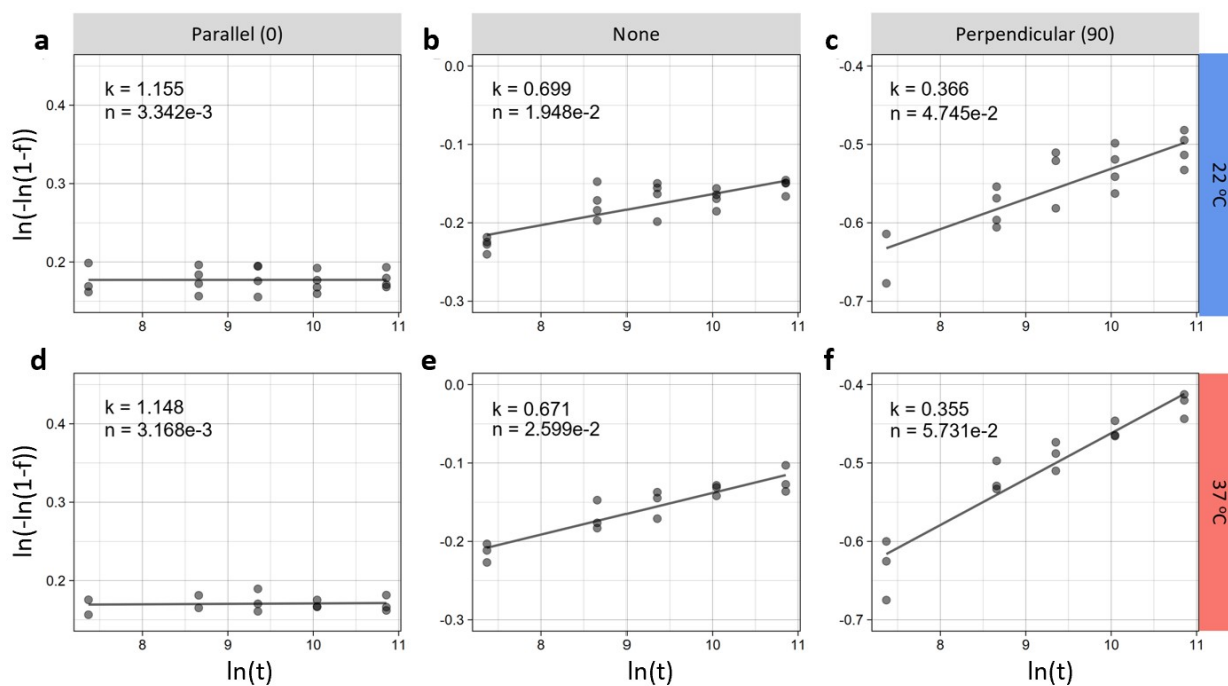

**Supplemental #2: Avrami fits for long-term crystallization kinetics.**

22 °C

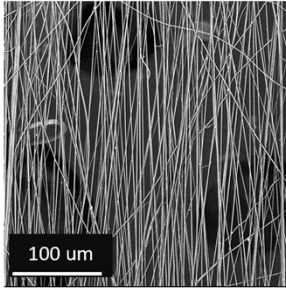

36 °C

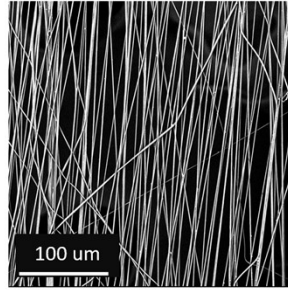

48 °C

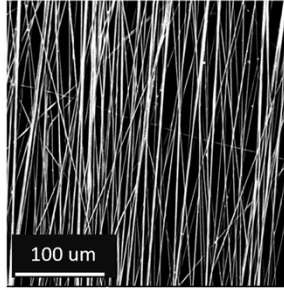

54 °C

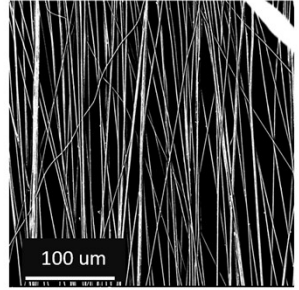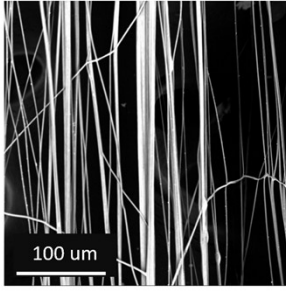

62 °C

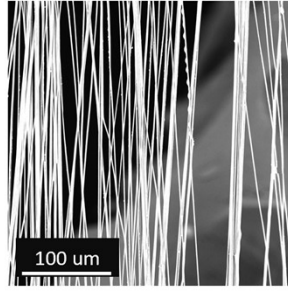

70 °C

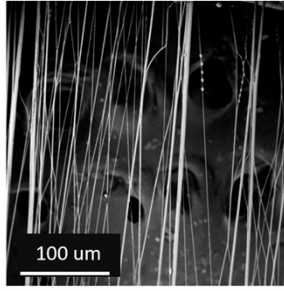

80 °C

**Supplemental #3: Representative SEM images showing morphology changes as a function of temperature.** Starting at 60 °C, individual nanofibers begin fusing together into bundles.

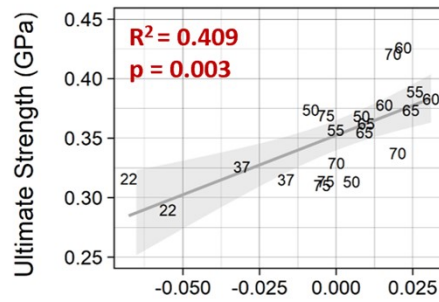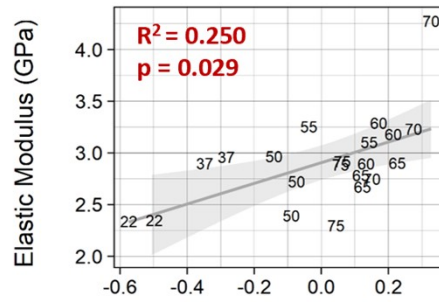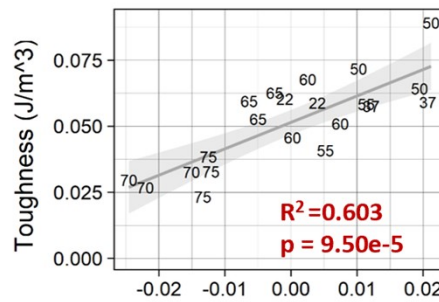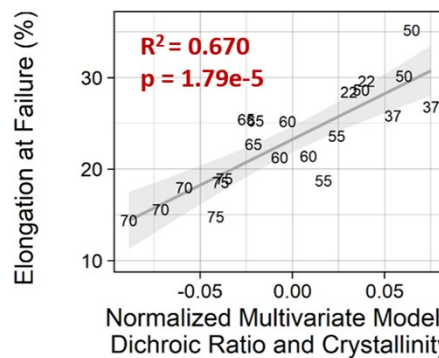

**Supplemental #4: Multivariable Linear Model of Mechanical Properties:** shows the mechanical measurements as the dependent variable of a multivariable linear model that uses dichroic ratio and crystallinity as inputs.

|        | Crystallinity | DR    | Cryst/DR |
|--------|---------------|-------|----------|
| UTS    | 0.025         | 0.020 | 1.247    |
| YM     | 0.265         | 0.111 | 2.377    |
| Tough. | -0.008        | 0.008 | -0.916   |
| Elong. | -0.037        | 0.018 | -2.115   |

**Supplemental #5: Loadings of multivariable linear model.** The first two columns show the loadings of the multivariable linear model for percent crystallinity and dichroic ratio, respectively. The third column (Cryst/DR) is the ratio of the first two columns, which shows the degree to which one molecular property makes a larger contribution to a given mechanical property.

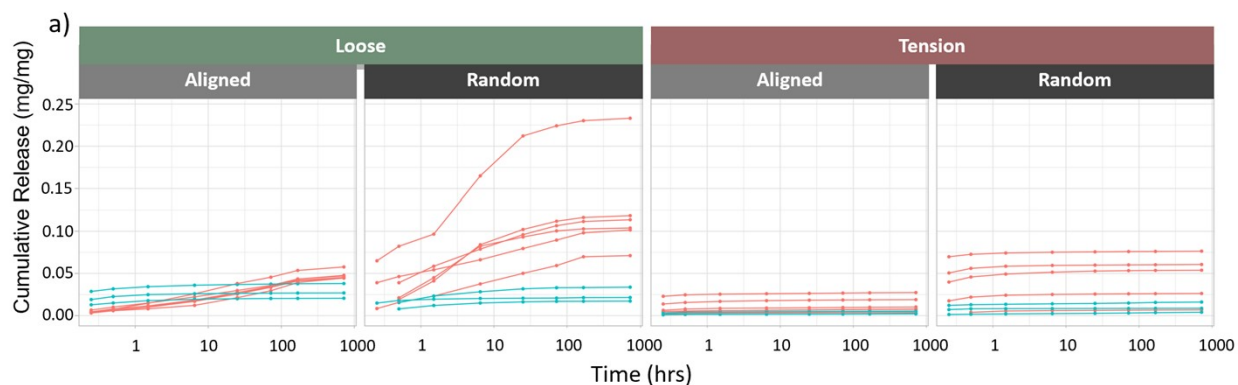

**Supplemental #6: Absolute cumulative release.** Same data as reported in figure 8a, except not normalized to maximum release.
